# Supplementary material for: Expression of epithelial cell-derived cytokine genes in the duodenal and colonic mucosae of dogs with chronic enteropathy
Source: PubMed Central journal article supplement — J Vet Med Sci. 2016 Dec 29;79(2):393–7. doi: 10.1292/jvms.16-0451 (PMC5326947; doi:10.1292/jvms.16-0451), 2016-12-29
Supplement: jvms-79-393-s001.pdf [file jvms-79-393-s001.pdf]

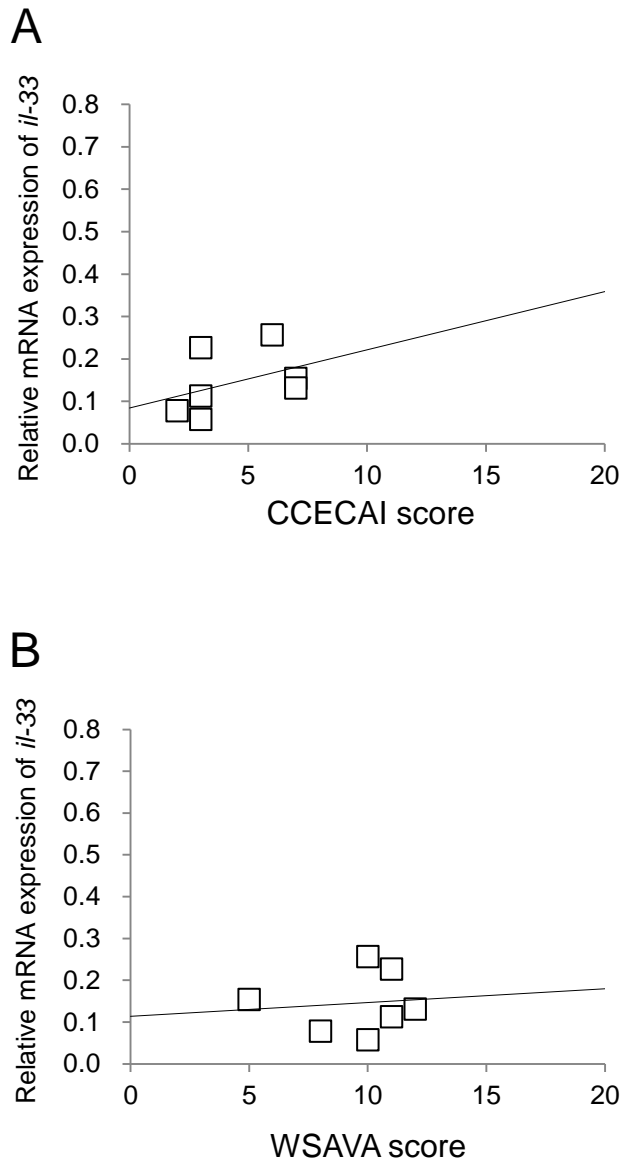

Supplementary Fig. 1. Analysis of correlations between expression levels of *il-33* mRNA and the canine chronic enteropathy clinical activity index (CCECAI) score (A) and between those of *il-33* mRNA and the world small animal veterinary association (WSAVA) score (B) in the duodenal mucosa of dogs with food-responsive enteropathy (n=7) by the Spearman's rank correlation coefficient.

Supplementary Table 1. Sequences of oligonucleotide primers

| Gene                       | Primer  | Sequence (5'-3')          | GenBank accession number | Size (bp) |
|----------------------------|---------|---------------------------|--------------------------|-----------|
| <i>Il-25</i>               | Forward | ACCCACTGGCCTAACTGCTGTC    | XM_005623236.2           | 76        |
|                            | Reverse | TGAGCACAGTGTCCCGCTTC      |                          |           |
| <i>Il-33</i>               | Forward | AAGTACCATGGTGAGGCCACAAG   | NM_001003180.1           | 138       |
|                            | Reverse | AGATCCCTGGAGCATAGAGTCAGAA |                          |           |
| <i>Tslp</i> <sup>a)</sup>  | Forward | AGCTGGTAGGGCTGGTGCTAA     | XM_005618038.1           | 129       |
|                            | Reverse | CTGAACTCCGTGCTCCTGTC      |                          |           |
| <i>Gapdh</i> <sup>b)</sup> | Forward | CATTGCCCTCAATGACCACT      | NM_001003142.2           | 105       |
|                            | Reverse | TCCTTGGAGGCCATGTAGAC      |                          |           |
| <i>Tbp</i> <sup>c)</sup>   | Forward | CTATTTCTTGGTGTGCATGAGG    | XM_849432.4              | 96        |
|                            | Reverse | CCTCGGCATTCAGTCTTTTC      |                          |           |
| <i>Sdha</i> <sup>d)</sup>  | Forward | GCCTTGGATCTCTTGATGGA      | XM_535807.5              | 92        |
|                            | Reverse | TTCTTGGCTCTTATGCGATG      |                          |           |
| <i>Hmbs</i> <sup>e)</sup>  | Forward | TCACCATCGGAGCCATCT        | XM_546491                | 112       |
|                            | Reverse | GTTCCCACCACGCTCTTCT       |                          |           |

<sup>a)</sup> Thymic stromal lymphoprotein

<sup>b)</sup> Glyceraldehyde 3-phosphate dehydrogenase.

<sup>c)</sup> TATA-binding protein.

<sup>d)</sup> Succinate dehydrogenase complex, subunit A.

<sup>e)</sup> Hydroxymethylbilane synthase

Supplementary Table 2. Clinical and histopathological characteristics of 21 dogs with chronic enteropathy

| Group ( <i>n</i> ) | Age (Mean±SD)                     | Sex <sup>a)</sup> ( <i>n</i> ) | Body weight (Mean±SD)         | Breeds ( <i>n</i> )                                                                                                                                | Histopathological diagnosis in the duodenum ( <i>n</i> )                               | Histopathological diagnosis in the colon ( <i>n</i> )                            |
|--------------------|-----------------------------------|--------------------------------|-------------------------------|----------------------------------------------------------------------------------------------------------------------------------------------------|----------------------------------------------------------------------------------------|----------------------------------------------------------------------------------|
| ARE (3)            | 2.5-7.0 years<br>(5.4±2.5 years)  | M (1), Fs (2)                  | 5.2-29.7 kg<br>(16.7±12.3 kg) | Border Collie (1), Flat-Coated Retriever (1),<br>Miniature Dachshund (1)                                                                           | Lymphoplasmacytic duodenitis (3)                                                       | Lymphoplasmacytic colitis (3)                                                    |
| FRE (7)            | 2.0-10.7 years<br>(6.1±3.7 years) | Mn (7)                         | 3.1-19.5 kg<br>(8.4±5.7 kg)   | Maltese (2), Beagle (1), Italian Greyhound (1),<br>Miniature Dachshund (1), Papillon (1), Shiba (1)                                                | Lymphoplasmacytic duodenitis (6)<br>Lymphoplasmacytic and eosinophilic duodenitis (1)  | Lymphoplasmacytic colitis (3),<br>Lymphoplasmacytic and eosinophilic colitis (1) |
| IBD (11)           | 1.8-14.2 years<br>(7.2±3.4 years) | M (3), Mn (6),<br>F (2)        | 3.3-23.95 kg<br>(9.1±6.6 kg)  | Cross-breed (3), Border Collie (1), Brussels<br>Griffon (1), Chin (1), Maltese (1), Papillon (1),<br>Poodle (1), Pug (1), Pembroke Welsh Corgi (1) | Lymphoplasmacytic duodenitis (10)<br>Lymphoplasmacytic and neutrophilic duodenitis (1) | Lymphoplasmacytic colitis (9)                                                    |

<sup>a)</sup> M: Male, intact; Mn: Male, neutered; F: Female, intact; Fs: Female, spayed
